# Supplementary material
Source: MDPI journal article supplement (https://www.mdpi.com/2073-4344/12/10/1226)
Supplement: s1 [file s1]

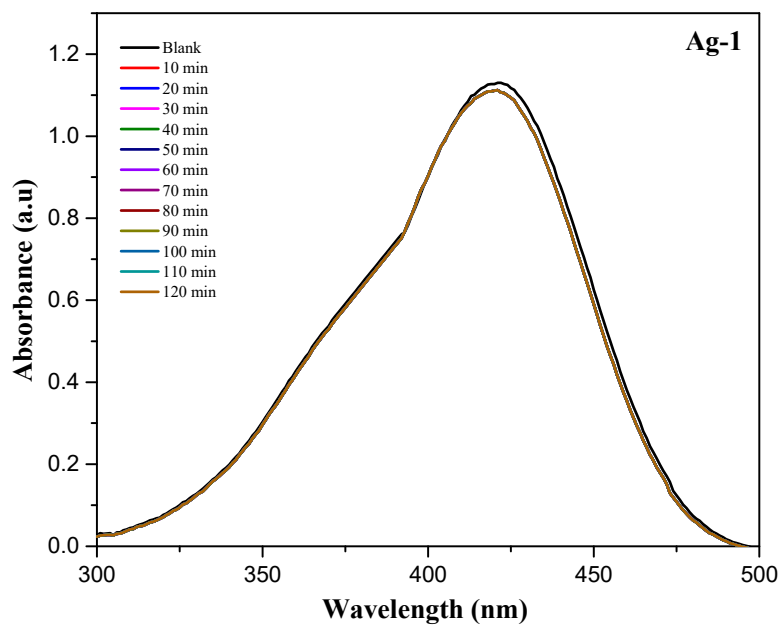

**Figure S1.** UV-vis spectra for photocatalytic degradation of *p*-NP over synthesized Ag-1 nano-material under visible light.

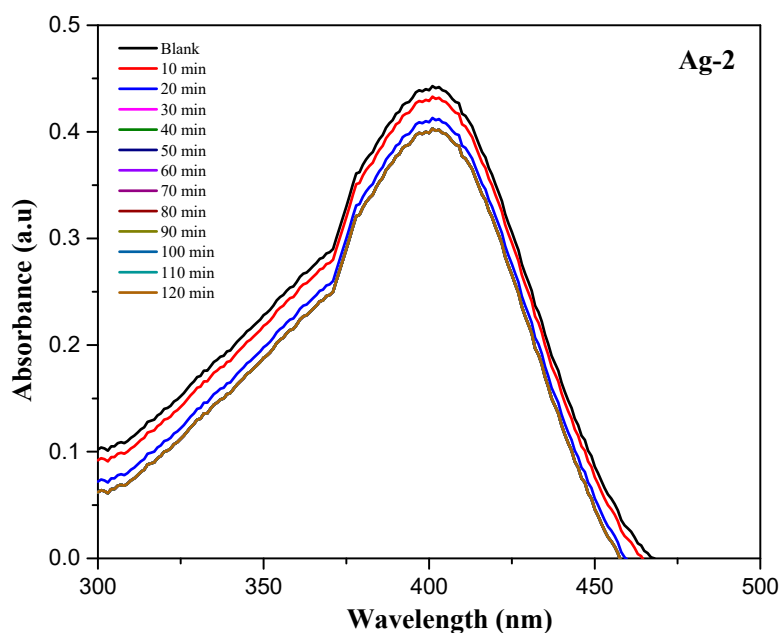

**Figure S2.** UV-vis spectra for photocatalytic degradation of *p*-NP over synthesized Ag-2 nano-material under visible light.

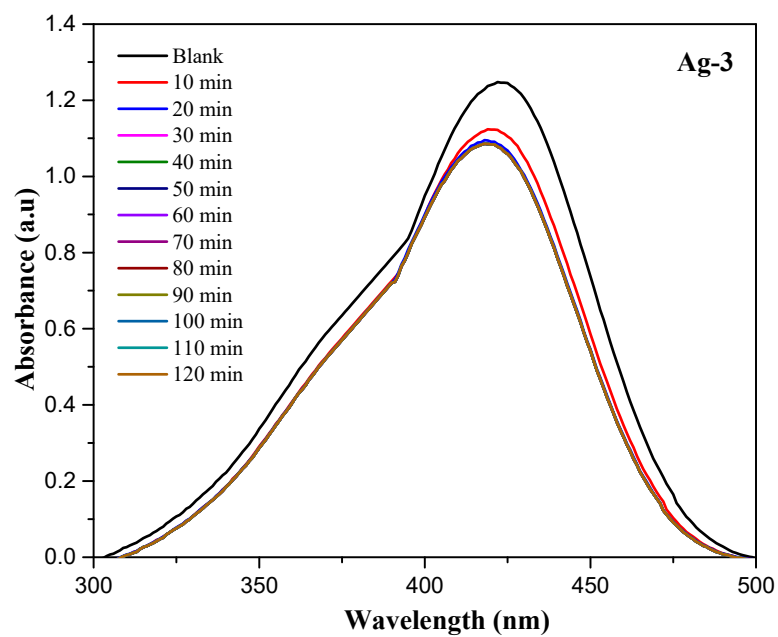

**Figure S3.** UV-vis spectra for photocatalytic degradation of *p*-NP over synthesized Ag-3 nano-material under visible light.

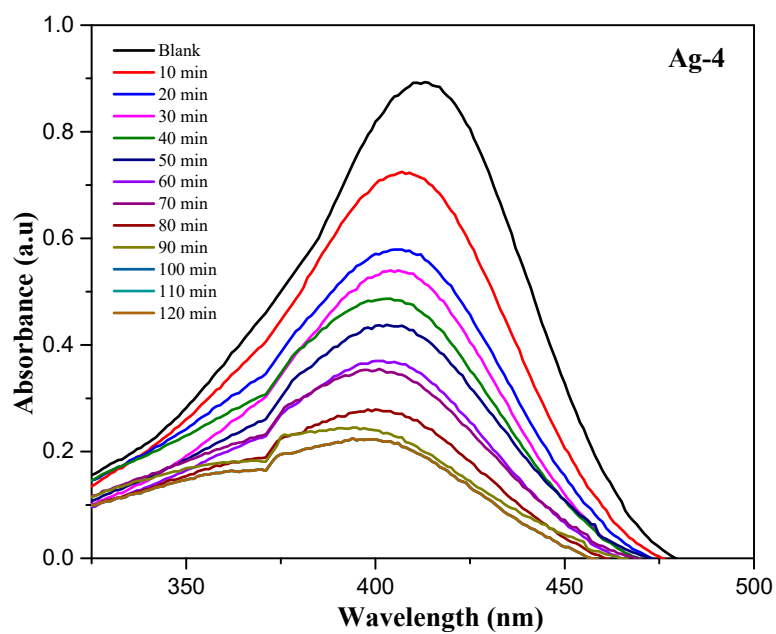

**Figure S4.** UV-vis spectra for photocatalytic degradation of *p*-NP over synthesized Ag-4 nano-material under visible light.

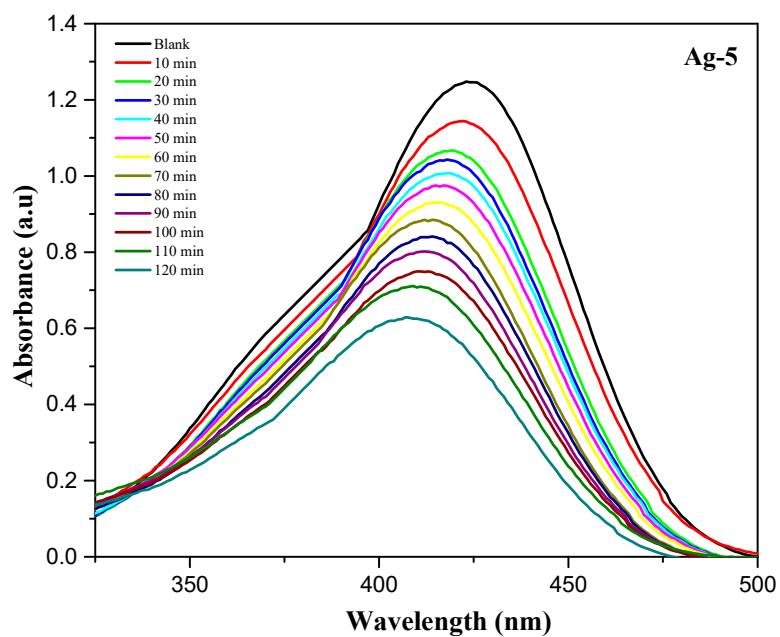

**Figure S5.** UV-vis spectra for photocatalytic degradation of *p*-NP over synthesized Ag-5 nano-material under visible light.
